# Supplementary material for: Exploring human mixing patterns based on time use and social contact data and their implications for infectious disease transmission models
Source: Springer Nature journal article supplement (doi:10.1186/s12879-022-07917-y), 2022-12-19
Supplement: MOESM1 [file 23843428]

# Additional file 1: Missing data exploration and the list of variables included in the imputation model.

## Missing data

Table S1: Missing frequency in time use data

|                     |      |    |    |    |   |   |   |   |   |   |    |    |    |    |    |    |    |    |
|---------------------|------|----|----|----|---|---|---|---|---|---|----|----|----|----|----|----|----|----|
| Nr of not-filled in | 0    | 1  | 2  | 3  | 4 | 5 | 6 | 7 | 8 | 9 | 10 | 11 | 12 | 13 | 14 | 15 | 16 | 17 |
| Nr of participants  | 1576 | 14 | 12 | 10 | 8 | 4 | 5 | 3 | 6 | 3 | 3  | 1  | 2  | 1  | 1  | 6  | 3  | 49 |

Table S2: Missing frequency by diary versions. Version 1 is for children less than 13, version 2 is for participants from 13 to 65 and version 3 for participants older than 65.

| Nr of not-filled in | Version 1 | Version 2 | Version 3 |
|---------------------|-----------|-----------|-----------|
| 0                   | 283       | 1012      | 281       |
| 1+                  | 13        | 90        | 28        |

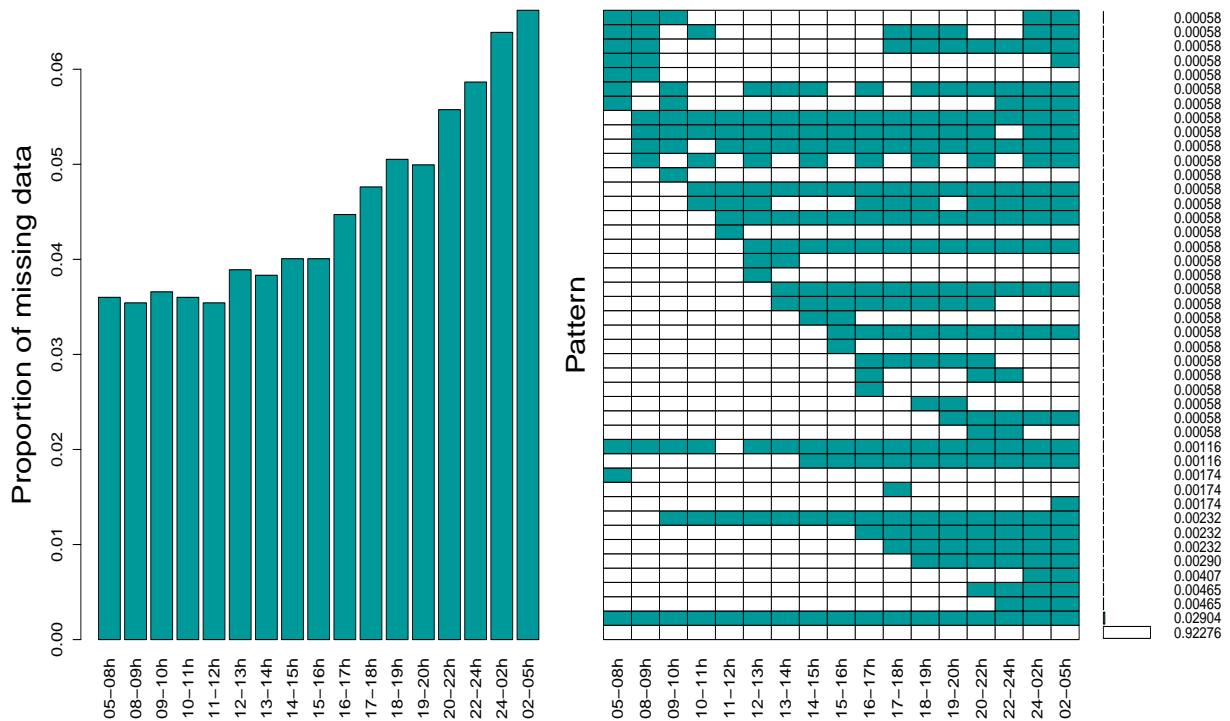

Figure S1: Missing data by time slots

## Variables included in the imputation model

Table S3: Variables included in the imputation model

| Nr  | Variable name        | Variable labels                                            | Type          | Value labels                                                                                                                  |
|-----|----------------------|------------------------------------------------------------|---------------|-------------------------------------------------------------------------------------------------------------------------------|
| 1.  | participant_age      | Age of survey participants                                 | Integer       |                                                                                                                               |
| 2.  | participant_gender   | Gender of survey participants                              | String 1 char | M: male<br>F: female                                                                                                          |
| 3.  | dayofweek            | Day of the week of filling in the diary                    | Integer       | 0: Sunday<br>1: Monday<br>2: Tuesday<br>3: Wednesday<br>4: Thursday<br>5: Friday<br>6 : Saturday                              |
| 4.  | holiday              | Was the diary filled in during a public or school holiday? | String 1 char | Y: Yes<br>N: No                                                                                                               |
| 5.  | time_use_location_1  | Location where you spent the most time between: 5-8h       | Integer       | 1: home<br>2: kinder-garden<br>3: school<br>4: workplace<br>5: transport<br>6: family<br>7: leisure<br>8: other<br>9: missing |
| 6.  | time_use_location_2  | Location where you spent the most time between: 9-10h      | Integer       | As above                                                                                                                      |
| 7.  | time_use_location_3  | Location where you spent the most time between: 10-11h     | Integer       | As above                                                                                                                      |
| 8.  | time_use_location_4  | Location where you spent the most time between: 11-12h     | Integer       | As above                                                                                                                      |
| 9.  | time_use_location_5  | Location where you spent the most time between: 12-13h     | Integer       | As above                                                                                                                      |
| 10. | time_use_location_6  | Location where you spent the most time between: 13-14h     | Integer       | As above                                                                                                                      |
| 11. | time_use_location_7  | Location where you spent the most time between: 14-15h     | Integer       | As above                                                                                                                      |
| 12. | time_use_location_8  | Location where you spent the most time between: 15-16h     | Integer       | As above                                                                                                                      |
| 13. | time_use_location_9  | Location where you spent the most time between: 16-17h     | Integer       | As above                                                                                                                      |
| 14. | time_use_location_10 | Location where you spent the most time between: 17-18h     | Integer       | As above                                                                                                                      |
| 15. | time_use_location_11 | Location where you spent the most time between: 18-19h     | Integer       | As above                                                                                                                      |
| 16. | time_use_location_12 | Location where you spent the most time between: 19-20h     | Integer       | As above                                                                                                                      |
| 17. | time_use_location_13 | Location where you spent the most time between: 20-22h     | Integer       | As above                                                                                                                      |
| 18. | time_use_location_14 | Location where you spent the most time between: 22-24h     | Integer       | As above                                                                                                                      |
| 19. | time_use_location_15 | Location where you spent the most time between: 24-02h     | Integer       | As above                                                                                                                      |
| 20. | time_use_location_16 | Location where you spent the most time between: 02-05h     | Integer       | As above                                                                                                                      |
| 21. | time_use_location_17 | Location where you spent the most time between: 05-08h     | Integer       | As above                                                                                                                      |
| 22. | hh_size              | Household size including participants                      | Integer       |                                                                                                                               |

## Calculation of Confidence Interval (CI)

MI is used for the dataset  $\mathcal{D} = \{\mathcal{D}^{obs}, \mathcal{D}^{mis}\}$  where the data matrix consist of both observed and missing values. For each of the  $\mathcal{M}$  imputed datasets  $\mathcal{D}_m$ ,  $\mathcal{B}$  bootstrap samples are drawn which yields  $\mathcal{M} \times \mathcal{B}$  datasets  $\mathcal{D}_{m,b}^*$  where  $b = 1, \dots, \mathcal{B}$  and  $m = 1, \dots, \mathcal{M}$ . In each of these datasets, the parameter of interest is estimated,  $\hat{\theta}_{m,b}^*$ . The pooled set of ordered estimates  $\Theta_{MB}^* = \{\hat{\theta}_{m,b}^*; b = 1, \dots, \mathcal{B}; m = 1, \dots, \mathcal{M}\}$  is used to construct the  $1-2\alpha$  % confidence interval for  $\theta$  [4]:

$$[\hat{\theta}_{lower}; \hat{\theta}_{upper}] = [\hat{\theta}_{MB}^{*,\alpha}; \hat{\theta}_{MB}^{*,1-\alpha}] \quad (1)$$

Where  $\hat{\theta}_{MB}^{*,\alpha}$  is the  $\alpha$  percentile of the ordered estimates  $\Theta_{MB}^*$
