# Supplementary material for: Exploring human mixing patterns based on time use and social contact data and their implications for infectious disease transmission models
Source: Springer Nature journal article supplement (doi:10.1186/s12879-022-07917-y), 2022-12-19
Supplement: MOESM4 [file 23843428]

# Additional file 4: Number of contacts and temporal social contact matrices by distance

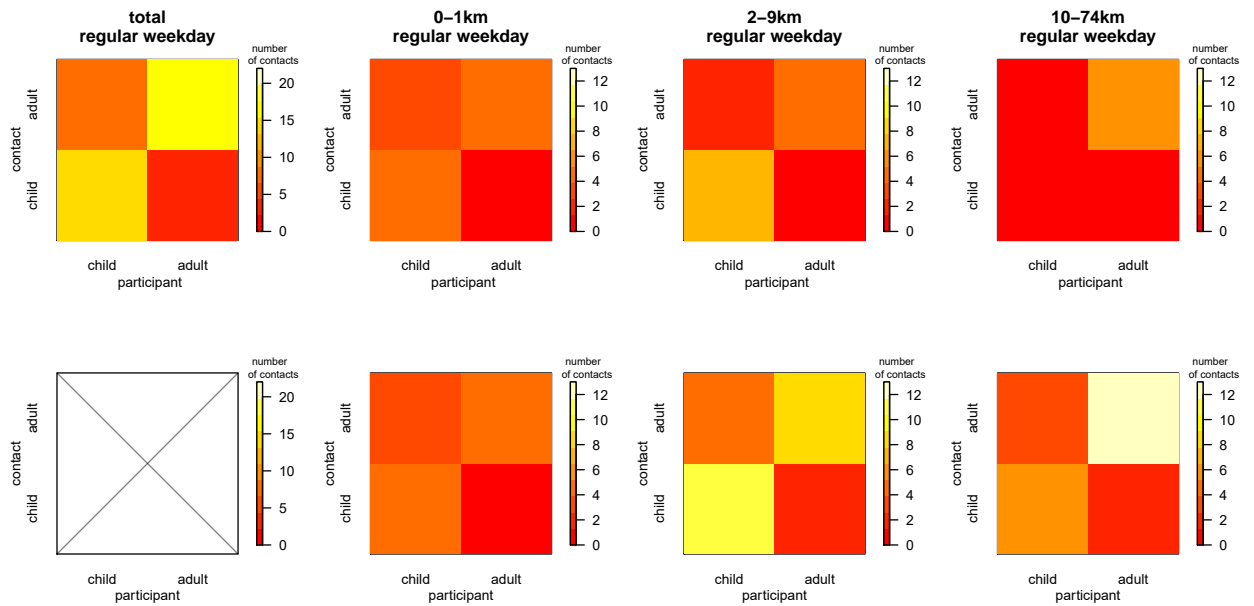

Figure S1: Social contact matrices on regular weekdays by distance, unconditional (top) and conditional (bottom) upon presence.

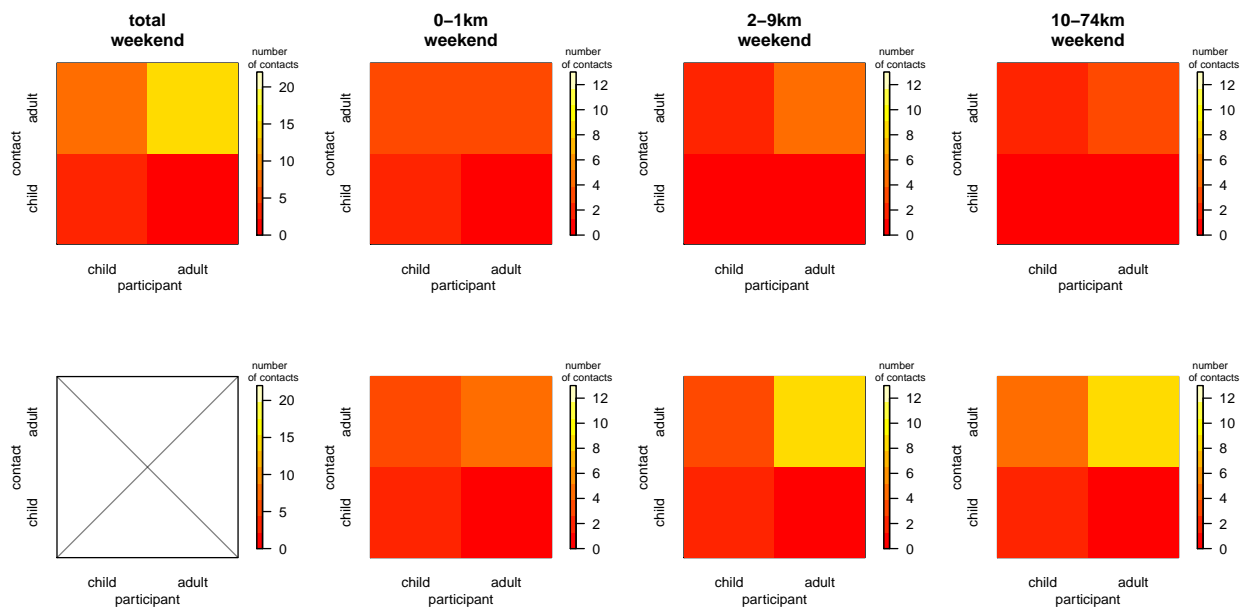

Figure S2: Social contact matrices on weekend days by distance, unconditional (top) and conditional (bottom) upon presence.
